# Supplementary material for: Divide et impera: An In Silico Screening Targeting HCMV ppUL44 Processivity Factor Homodimerization Identifies Small Molecules Inhibiting Viral Replication
Source: MDPI journal article supplement (doi:10.3390/v13050941), 2021-05-20
Supplement: s1 [file s1]

# ***Divide et impera: an in silico screening targeting HCMV ppUL44 processivity factor homodimerization identifies small molecules inhibiting viral replication***

**Hanieh Ghassabian<sup>1</sup>, Federico Falchi<sup>2</sup>, Martina Timmoneri<sup>1</sup>, Beatrice Mercorelli<sup>1</sup>, Arianna Loregian<sup>1</sup>, Giorgio Palù<sup>1</sup>, Gualtiero Alvisi<sup>1\*</sup>**

<sup>1</sup> Department of Molecular Medicine, University of Padua, Italy; hanieghassabian@gmail.com; martina.timmoneri@gmail.com; beatrice.mercorelli@unipd.it; arianna.loregian@unipd.it; Giorgio.palu@unipd.it; gualtiero.alvisi@unipd.it

<sup>2</sup> Molecular Horizon, Bettona (PG), Italy federico.falchi@hotmail.com

\* Correspondence: gualtiero.alvisi@unipd.it;

# Supplementary Figure S1

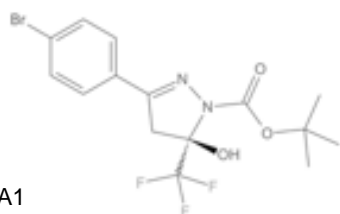

A1

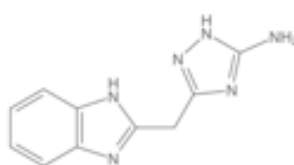

A2

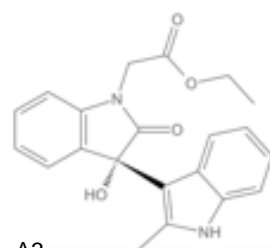

A3

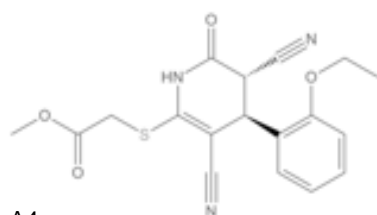

A4

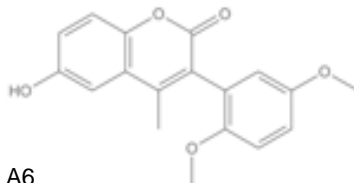

A6

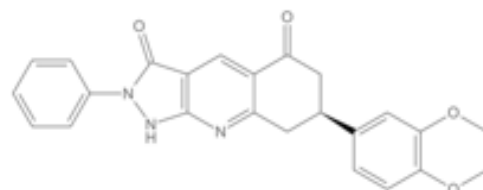

B1

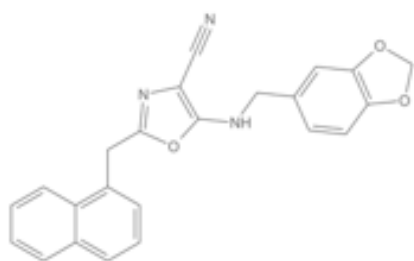

B2

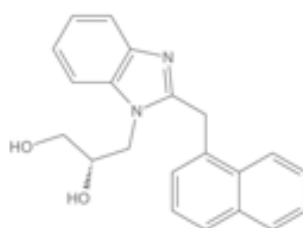

B3

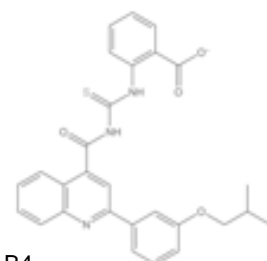

B4

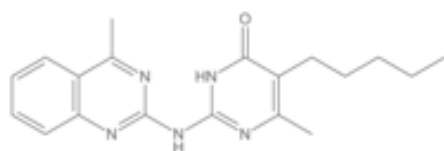

B5

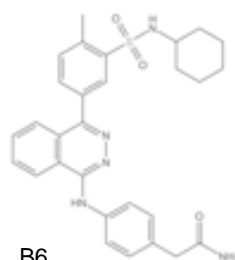

B6

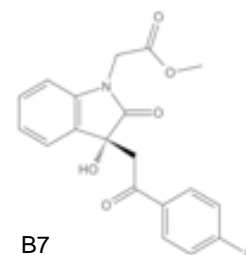

B7

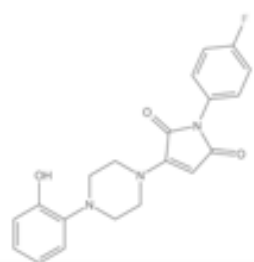

B8

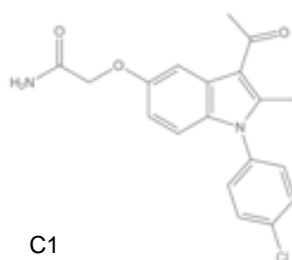

C1

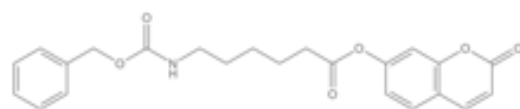

C2

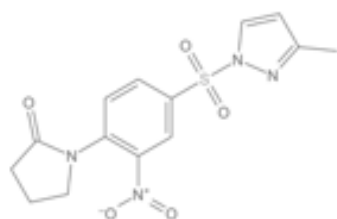

C3

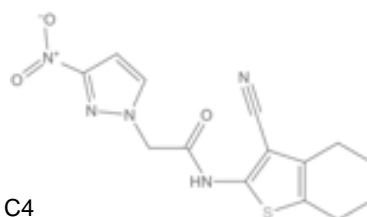

C4

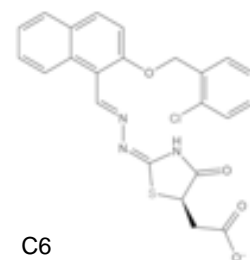

C6

# Supplementary Figure S2

TB4-UL83-YFP

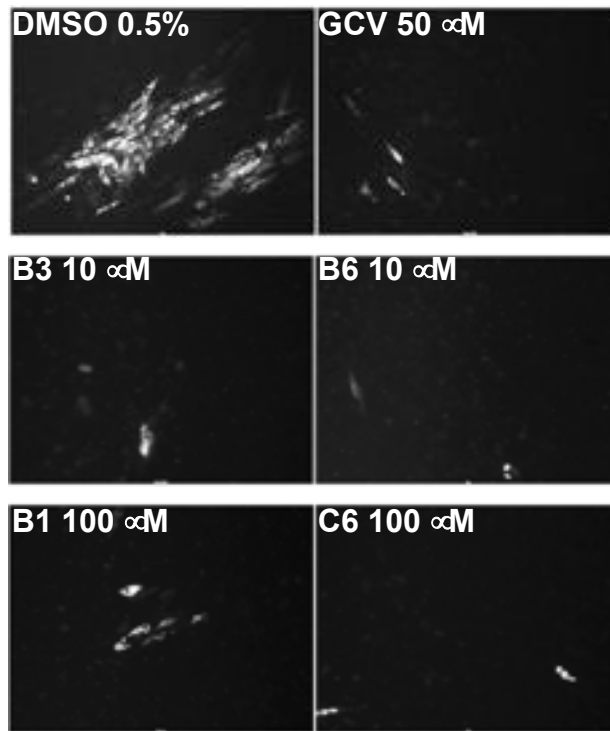

## **Supplementary Figure S3**

**A**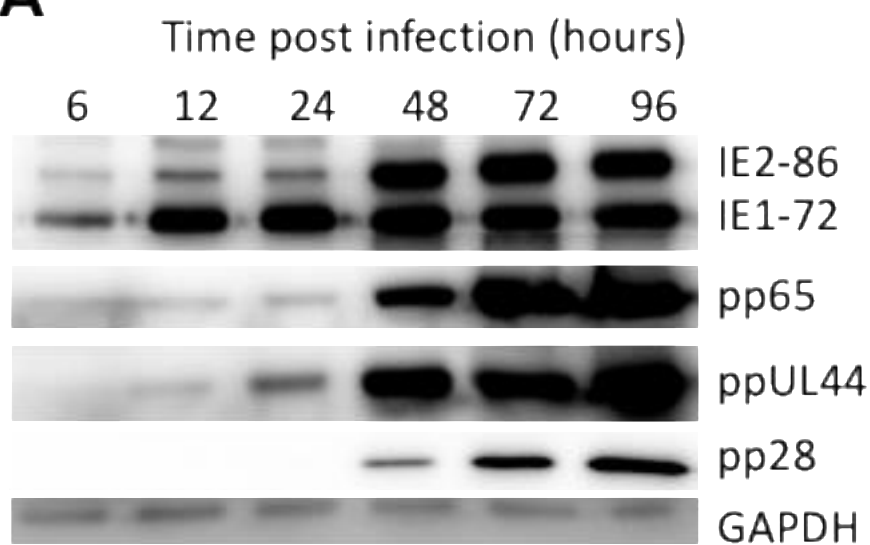**B**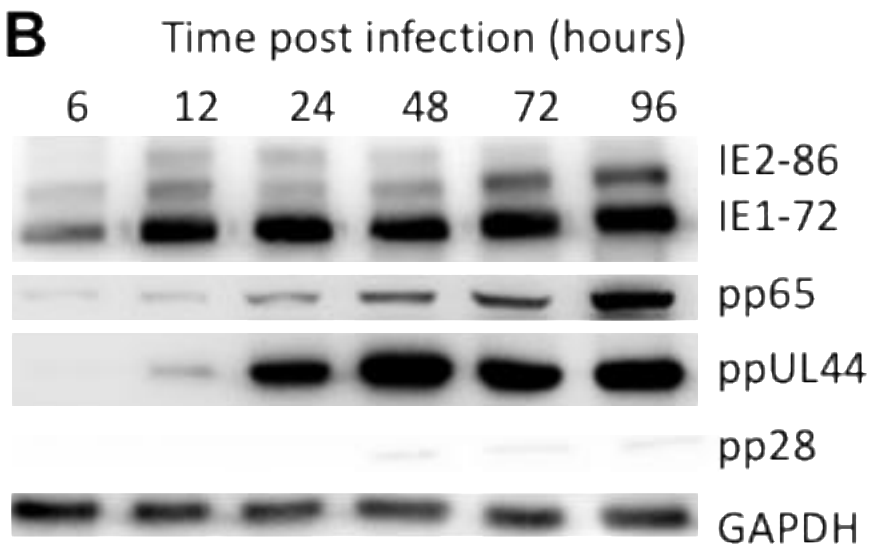**C**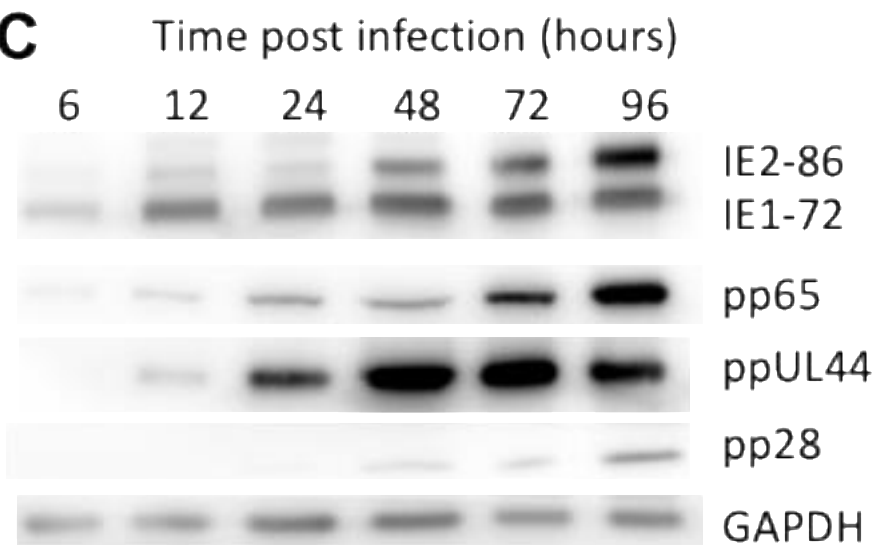

**Supplementary Figure S1. Molecular structures of purchased SMs.** The chemical structure of each purchased SM is shown.

**Supplementary Figure S2. Treatment with selected compounds inhibits the replication of TB4-UL83-YFP reporter virus.** MRC5 cells infected and treated as described in legend of Figure 2 were analyzed with a fluorescence inverted microscope, equipped with a 20x objective, a digital camera and appropriate filter set to visualize expression of YFP-UL83 at 7 days p.i.. Representative images are shown relative to cells treated as indicated.

**Supplementary Figure S3. B3 specifically impairs early and late HCMV AD169 gene expression.** MRC5 were infected with HCMV AD169 and treated as described in the Materials and Methods section with either vehicle alone (A, DMSO 0.5%), GCV (B, 50  $\mu$ M in DMSO 0.5%) or B3 (C, 50  $\mu$ M in DMSO 0.5%). At the indicated time points p.i., cells were lysed and processed for Western Blotting to detect the expression of the immediate early IE1/2 antigens, the early-late antigens ppUL44 and pp65 as well as the late antigen pp28. GAPDH was also detected as loading control.
