# Supplementary material for: Divide et impera: An In Silico Screening Targeting HCMV ppUL44 Processivity Factor Homodimerization Identifies Small Molecules Inhibiting Viral Replication
Source: Viruses. 2021 May 20;13(5):941. doi: 10.3390/v13050941 (PMC8160850; doi:10.3390/v13050941)
Supplement: Supplementary file 1 [file viruses-13-00941-s001.zip › Suppplementary Table Compounds.xlsx]

## Sheet: Identified Compounds
Supplementary Table I. List of compounds identified after the in silico screening
ZINC_ID		smiles
ZINC00056167		c1ccc(c(c1)/C=N/NC(=O)CNc2c(=O)[nH]c(=O)[nH]n2)Cl
ZINC00095484		c1ccc(c(c1)C(=O)Nc2cccc(c2)C(=O)N)C(=O)[O-]
ZINC00198448		c1ccc2c(c1)cccc2[C@@H]3CC(=O)NC(=C3C#N)SCC(=O)N
ZINC00307145		Cc1cc2c(cc1C)n(cn2)C[C@H](COc3ccccc3OC)O
ZINC00334660		Cc1cc2c(cc1C)n(cn2)C[C@H](COc3ccccc3)O
ZINC00388800		c1cc(ccc1C(=O)CSc2nnc3n2[nH]c(=O)[nH]c3=O)Cl
ZINC00454544		COc1ccc(cc1)/C=C/C(=O)Nc2ccc(cc2)C(=O)N
ZINC00517885		c1ccc(cc1)Cn2cc(c3c2cccc3)CNC(=O)CCC(=O)[O-]
ZINC00654494		CC1=C(/C(=C/c2ccc(cc2)OCC(=O)NC[C@@H]3CCCO3)/C(=O)N1Cc4ccccc4)C(=O)OC
ZINC00783833		Cc1ccc(cc1)C(=O)C[C@]2(c3ccccc3N(C2=O)CC(=O)OC)O
ZINC00793356		COC(=O)CN1c2ccccc2[C@@](C1=O)(CC(=O)c3ccc(cc3)F)O
ZINC00798328		Cc1c(c2cc(ccc2n1c3ccc(cc3)Cl)OCC(=O)N)C(=O)C
ZINC00853024		c1ccc(c(c1)NC(=O)c2ccc(cc2)N3C(=O)c4ccc(cc4C3=O)C(=O)Nc5ccccc5O)O
ZINC00859037		9019436
ZINC00859085		CC1=C([C@H](C(=C(N1)SCC(=O)OC)C#N)c2ccc(cc2)Cl)C(=O)OC(C)(C)C
ZINC00907066		Cc1ccc(cc1)C(=O)CSc2nnc(n2C)CSc3nc(cc(n3)C)C
ZINC00915250		CCOC(=O)CN1c2ccccc2[C@@](C1=O)([C@H](C)C(=O)c3ccccc3)O
ZINC01024681		CC1=C([C@@H](C2=C(N1)CC(CC2=O)(C)C)c3ccncc3)C(=O)OCc4ccc(cc4)OC
ZINC01070326		c1cn(nc1[N+](=O)[O-])CC(=O)Nc2c(c3c(s2)CCCC3)C#N
ZINC01112200		CCOC(=O)CN1c2ccccc2[C@@](C1=O)(c3c([nH]c4c3cccc4)C)O
ZINC01245101		CCOc1ccccc1[C@@H]2[C@H](C(=O)NC(=C2C#N)SCC(=O)OC)C#N
ZINC01441541		c1ccc(c(c1)N2CCN(CC2)C3=CC(=O)N(C3=O)c4ccc(cc4)F)O
ZINC01588766		c1ccc(cc1)c2ccc(cc2)Oc3nc(nc(n3)S)S
ZINC01614102		Cc1ccc(cc1)NC(=O)/C(=C/C(=O)C2=C(Nc3ccccc3S2)C)/[O-]
ZINC01624266		Cc1cc(ccc1NC(=O)/C(=C/C(=O)C2=C(Nc3ccccc3S2)C)/[O-])Cl
ZINC02033818		c1ccc(cc1)C[C@@H](C(=O)[O-])NC(=O)[C@@H](Cc2c[nH]c3c2cccc3)[NH3+]
ZINC02083615		c1nc(nn1CC(=O)Nc2c(c3c(s2)CCCCC3)C#N)[N+](=O)[O-]
ZINC02092720		Cc1c2ccc(cc2oc(=O)c1CCC(=O)[O-])OCc3c(cccc3Cl)F
ZINC02111844		Cc1c2cc(c(cc2oc(=O)c1CCC(=O)N[C@@H](CCCNC(=O)N)C(=O)[O-])O)Cl
ZINC02127971		Cc1c2ccc(c(c2oc(=O)c1CCC(=O)N[C@@H](Cc3c[nH]c4c3cc(cc4)O)C(=O)[O-])C)O
ZINC02131247		Cc1c(ccc2c1oc(=O)c3c2CCC3)O[C@@H](C)C(=O)N[C@@H](Cc4c[nH]c5c4cc(cc5)O)C(=O)[O-]
ZINC02134756		CCCCc1cc(=O)oc2c1ccc(c2)O[C@H](C)C(=O)N[C@@H](Cc3c[nH]c4c3cc(cc4)O)C(=O)[O-]
ZINC02145418		Cc1c2ccc(cc2oc(=O)c1CCC(=O)[O-])OCc3ccccc3OC
ZINC02148217		Cc1c(c(=O)oc2c1ccc(c2)OC(=O)CCCNC(=O)OCc3ccccc3)C
ZINC02148915		Cc1cc(cc(c1)COc2ccc3c(c(c(=O)oc3c2)CCC(=O)[O-])C)C
ZINC02149522		Cc1c(c(=O)oc2c1ccc(c2C)OC(=O)CCCCCNC(=O)OCc3ccccc3)C
ZINC02196751		COC(=O)CSC1=C([C@@H](CC(=O)N1)c2ccc(cc2)Br)C#N
ZINC02206649		CC1=C([C@H](C(=C(N1)SCC(=O)NCc2ccccc2)C#N)c3ccc(cc3)Cl)C(=O)OCCOC
ZINC02269985		c1ccc(cc1)COC(=O)NCCCCCC(=O)Oc2ccc3ccc(=O)oc3c2
ZINC02293322		CC(C)(C)[C@H]1CCc2c(sc(c2C#N)NC(=O)Cn3cnc(n3)[N+](=O)[O-])C1
ZINC02326440		c1cc(ccc1Cc2nnc(s2)NC(=O)Nc3ccc(cc3Cl)Cl)F
ZINC02423610		c1ccc2c(c1)cccc2Cc3nc(c(o3)NCc4ccc(cc4)F)C#N
ZINC02434635		c1ccc2c(c1)cccc2Cc3nc(c(o3)NCc4ccc5c(c4)OCO5)C#N
ZINC02742748		Cc1c(c(nn1CC(=O)Nc2c(c3c(s2)C[C@H](CC3)C)C#N)[N+](=O)[O-])Cl
ZINC02763985		Cc1c(c(n(n1)Cc2cccc(c2)Oc3ccccc3)C)NC(=O)c4ccc(c(c4)OC)OC
ZINC02789051		CC(C)COc1cccc(c1)c2cc(c3ccccc3n2)C(=O)NC(=S)Nc4ccccc4C(=O)[O-]
ZINC03838856		C[C@H](C(=O)N)NC(=O)C1=C[C@H]([C@H]([C@@H](C1)O)O)NC(=O)c2cc(ccc2Br)OC
ZINC03840033		c1cc(cc(c1)S(=O)(=O)N[C@@H]2C=C(C[C@H]([C@@H]2O)O)C(=O)NCC(=O)N)C(F)(F)F
ZINC03840087		c1ccc(cc1)C[C@H](C(=O)N)NC(=O)C2=C[C@H]([C@H]([C@@H](C2)O)O)NC(=O)c3ccc(c(c3)Cl)F
ZINC03840126		c1cc(sc1)CC(=O)N[C@@H]2C=C(C[C@H]([C@@H]2O)O)C(=O)N[C@@H](Cc3ccc(cc3)O)C(=O)N
ZINC04000297		Cc1c2ccc(cc2oc(=O)c1CC(=O)NCc3ccccn3)O
ZINC04016475		C[C@H]([C@H](C(=O)N)NC(=O)[C@@H](Cc1ccc(cc1)OCc2ccccc2)NC(=O)CNC(=O)OC(C)(C)C)O
ZINC04018288		c1ccc(cc1)C[C@@H](C(=O)N[C@H](Cc2ccccc2)C(=O)OCc3ccc(cc3)[N+](=O)[O-])NC(=O)C[NH3+]
ZINC04018289		c1ccc(cc1)C[C@H](C(=O)N[C@H](Cc2ccccc2)C(=O)OCc3ccc(cc3)[N+](=O)[O-])NC(=O)C[NH3+]
ZINC04046667		Cc1c2ccc(cc2oc(=O)c1CCC(=O)[O-])OCc3cccc(c3)Cl
ZINC04062802		c1ccc2cc(ccc2c1)S(=O)(=O)Nc3ccc(c(c3)O)C(=O)[O-]
ZINC04085376		Cc1c2cc(ccc2oc(=O)c1c3cc(ccc3OC)OC)O
ZINC04086325		Cc1c(oc2c1cc3c(c(c(=O)oc3c2)CCC(=O)NCCCO)C)C
ZINC04087564		Cc1coc2c1cc3c(c(c(=O)oc3c2)CCC(=O)NCCCO)C
ZINC04089195		Cc1cc2c(c(c(c(=O)o2)CC(=O)NCCCO)C)c3c1c(c(o3)C)C
ZINC04089326		Cc1c2cc3c(cc2oc(=O)c1CCC(=O)NCCCO)oc4c3CCCC4
ZINC04123731		Cc1ccc(c(c1)C)n2c(c(c3c2ccc(c3)OCC(=O)N)C(=O)C)C
ZINC04503235		CC(C)(C)OC(=O)N1[C@@](CC(=N1)c2ccc(cc2)Br)(C(F)(F)F)O
ZINC04524596		Cc1ccn(n1)S(=O)(=O)c2ccc(c(c2)[N+](=O)[O-])N3CCCC3=O
ZINC04717993		c1cn(nc1[N+](=O)[O-])CC(=O)Nc2c(c3c(s2)CCC3)C#N
ZINC04739401		CC(C)OC(=O)COc1ccc(cc1)/C=N/NC(=O)COc2ccc(cc2)Cl
ZINC04946974		CC1=C([C@H](C(=C(N1)SCC(=O)N)C#N)c2ccc(cc2)O)C(=O)C
ZINC04948490		c1ccc(c(c1)C(=O)[O-])NC(=O)c2cc(ccc2Cl)S(=O)(=O)N
ZINC05020185		CC1=C([C@H](C(=C(N1)SCC(=O)c2ccccc2)C#N)c3cccs3)C(=O)C
ZINC05273777		c1ccc(cc1)C[C@H](C(=O)Nc2ccc(cc2)[N+](=O)[O-])NC(=O)CCC(=O)[O-]
ZINC05555105		c1cc(oc1)/C=N\Nc2nc3c(c(=O)[nH]c(=O)[nH]3)nn2
ZINC05639805		COc1ccc(cc1)C(=O)CSc2[nH]c3c(n2)c(=O)[nH]c(n3)N
ZINC05955484		c1ccc2c(c1)ccc(c2[C@H]3N(C(=O)CS3)NS(=O)(=O)c4cccc(c4)C(=O)[O-])O
ZINC06142142		c1ccc(cc1)COC(=O)NCC2CCC(CC2)C(=O)Oc3ccc4c(c3)oc(=O)c5c4CCCC5
ZINC06494010		c1ccc2c(c1)[nH]c(n2)Cc3nc([nH]n3)N
ZINC06861557		Cn1c(nnc1SCC(=O)N)c2cc(nc3c2cccc3)c4ccccc4
ZINC08627473		CCOC(=O)[C@H](Cc1ccc(c(c1)N(CCO)CCO)O)N2C(=O)c3ccccc3C2=O
ZINC08637566		CCOC(=O)CNC(=O)[C@@H](Cc1cnc[nH]1)NC(=O)CNC(=O)OCc2ccccc2
ZINC08653226		Cc1cc(=O)[nH]c(n1)CNC(=O)c2cccc(c2)C(=O)NCc3cc(=O)[nH]c(n3)C
ZINC08723273		c1ccc2c(c1)ccc(c2C[NH2+]CCNC(=O)c3c(non3)N)OCc4ccccc4Cl
ZINC08725590		Cc1nc2c3ccccc3oc2c(n1)SCc4cc(n[nH]4)O
ZINC08763627		c1ccc(cc1)COc2ccc(cc2)C(=O)/C=C/c3ccc(o3)c4cc(ccc4Cl)C(F)(F)F
ZINC08764304		COc1ccc(cc1OC)CN(CCO)C(=O)COc2ccc3ccc(=O)oc3c2
ZINC08764365		Cc1c2ccc(cc2oc(=O)c1CCC(=O)N[C@H](CO)c3ccccc3)OCC(=C)C
ZINC08781111		CC(C)c1ccc(cc1)CNc2cc(ccc2[N+](=O)[O-])N3CCN(CC3)S(=O)(=O)c4ccc(cc4)Cl
ZINC08792096		Cc1c2cc3c(cc2oc(=O)c1CC(=O)NCc4ccccn4)OC5(CCCCC5)CC3
ZINC08792474		c1ccc2c(c1)c(c[nH]2)CCN3C(=O)[C@@H](NC3=O)CCC(=O)NCc4ccccn4
ZINC08952672		c1ccc(cc1)COC(=O)NCC2CCC(CC2)C(=O)Oc3ccc4c(c3)oc(=O)c5c4CCC5
ZINC08973086		CC(C)c1ccc(cc1)[C@@H]2CC(=O)NC(=C2C#N)SCC(=O)Nc3ccccc3
ZINC09015426		c1ccc(cc1)CNC(=O)CSC2=C([C@@H](CC(=O)N2)c3ccco3)C#N
ZINC09019436		Cc1ccc(cc1S(=O)(=O)NC2CCCCC2)c3c4ccccc4c(nn3)Nc5ccc(cc5)CC(=O)N
ZINC09089364		CCCOC(=O)CSC1=C([C@@H](CC(=O)N1)c2ccc(cc2)OCc3ccccc3)C#N
ZINC09237390		Cc1c2ccc(cc2oc(=O)c1Cl)OC(=O)C3CCC(CC3)CNC(=O)OCc4ccccc4
ZINC09303237		CCc1cc(=O)oc2c1cc(c(c2)OC(=O)C3CCC(CC3)CNC(=O)OCc4ccccc4)Cl
ZINC09329645		CCc1ccccc1NC(=O)CSC2=C([C@@H](CC(=O)N2)c3ccc(cc3)C)C#N
ZINC09422444		c1ccc(cc1)c2cc(c(c(n2)SCCC(=O)N)C#N)C(F)(F)F
ZINC09762871		c1ccc2c(c1)ccc(c2/C=N/N=C/3\NC(=O)[C@H](S3)CC(=O)[O-])OCc4ccccc4Cl
ZINC11851921		COc1ccc(cc1NS(=O)(=O)c2cccc3c2nccc3)C(=O)N
ZINC11867041		Cc1c2ccc(cc2oc(=O)c1Cc3ccccc3)OCC(=O)NCCC(=O)N4CC[C@]5(CCCC[C@@H]5C4)O
ZINC11867563		Cc1c(ccc2c1oc(=O)c3c2ccc(c3)OC)OC(=O)CCCCCNC(=O)OCc4ccccc4
ZINC11964118		Cc1nc(cs1)[C@@H](C)NC(=O)[C@@H]2Cc3c(sc(n3)NC(=O)c4ccsc4)C(=O)C2
ZINC12050930		Cc1ccccc1C(=O)Nc2nc3c(s2)C(=O)C[C@@H](C3)C(=O)NCc4csc(n4)C
ZINC12078140		COC(=O)c1c(cc(=O)n2c1CC[NH+](CC2)Cc3cccn3c4ncccn4)OC[C@H]5CCCCO5
ZINC12149762		Cc1ccccc1n2cc(cn2)CNC(=O)Cn3cc(cn3)NC(=O)c4ccccc4F
ZINC12218783		c1ccc(c(c1)N2CC[NH+](CC2)Cc3cccc(c3)OC[C@@H]4CCCN(C4)C(=O)C[C@@H]5C(=O)NC(=O)N5)F
ZINC12222494		COC(=O)Cn1cc(c2c1cccc2)C[NH+]3CCn4c(nnc4CO)C3
ZINC12250006		CC1=C([C@H](C(=C(N1)SCC(=O)OC)C#N)c2ccc(cc2)Cl)C(=O)C
ZINC12250090		c1ccc(cc1)[C@@H]2CC(=O)NC(=C2C#N)SCC(=O)c3ccc(cc3)Cl
ZINC12867739		COc1ccc(cc1)c2cc(=O)oc3c2ccc(c3)OCC(=O)N[C@@H](CCCNC(=O)N)C(=O)[O-]
ZINC12888804		C[C@H]([C@@H](C(=O)[O-])NC(=O)[C@@H](Cc1c[nH]c2c1cccc2)n3c(=O)c4ccccc4[nH]c3=O)O
ZINC12894167		Cc1coc2c1cc3c(c(c(=O)oc3c2)CCC(=O)N[C@@H](C)CO)C
ZINC12894622		Cc1coc2c1cc3c(c(c(=O)oc3c2)CCC(=O)NC[C@H](CO)O)C
ZINC12895825		Cc1c2ccc(cc2oc(=O)c1CCC(=O)N[C@@H](CCSC)CO)OC
ZINC12901096		Cc1coc2c1cc3c(c(c(=O)oc3c2)CCC(=O)N[C@@H](CCSC)CO)C
ZINC13119431		c1ccc2c(c1)[nH]c(n2)CCCCc3[nH]c4cc(ccc4n3)N
ZINC13174296		CCOC(=O)CSC1=C([C@@H](C2=C(N1)CCCC2=O)c3ccc(cc3)OCc4ccccc4)C#N
ZINC13567422		Cc1cccc(c1)CSc2nc3c(c(n2)[O-])[C@H](CC(=O)N3)c4ccc5c(c4)OCO5
ZINC13569506		c1ccc2c(c1)c(n[nH]c2=O)CC(=O)N3CCC(CC3)C(=O)NCc4ccccn4
ZINC13940588		c1ccc(c(c1)/C=N/NC(=O)CN(C2CCCCC2)S(=O)(=O)c3ccc(cc3)Cl)C(=O)[O-]
ZINC13945677		Cc1ccc(cc1)c2c(c3ccccc3n2C)[C@@H]4c5ccccc5C(=O)N4CC(=O)NCC(=O)N
ZINC14883432		Cc1c(nc(o1)c2cccc(c2)NC(=O)CCc3cccnc3)CNC(=O)c4ccc5cc[nH]c5c4
ZINC14997031		Cc1cnc(nc1[C@@H]2CCCN(C2)C(=O)CCc3ccc4c(c3)OCO4)SCc5cccnc5
ZINC15062278		COc1ccc(c2c1cccc2)OCc3cc(no3)C(=O)N4CCN(CC4)CCO
ZINC15832300		Cc1nc(cs1)CNC(=O)c2c(c3ccccc3s2)Cl
ZINC16115566		COc1ccc(cc1)C(=O)Oc2ccccc2/C=N/N=C/3\NC(=O)[C@@H](S3)CC(=O)[O-]
ZINC16676346		CC1=C([C@H](C(=C(N1)SCC(=O)c2ccc(cc2Cl)Cl)C#N)c3cccs3)C(=O)C
ZINC17207870		CC(=O)c1cccc(c1)NC(=O)Cn2cc([n+]3c2CCC3)c4ccc(cc4)Cl
ZINC18198322		COc1ccc(cc1OC)[C@H]2Cc3c(cc4c(n3)[nH]n(c4=O)c5ccccc5)C(=O)C2
ZINC18266646		CCCCCc1c(nc([nH]c1=O)Nc2nc(c3ccccc3n2)C)C
ZINC19741546		C[NH+](Cc1cccc(c1)OCCN2CCN(CC2)C(=O)c3ccc(cc3)n4ccnc4)C[C@@H]5CCC(=O)N5
ZINC19790269		COc1ccc(cc1OC)/C=N/NC(=O)CNc2c(=O)[nH]c(=O)[nH]n2
ZINC19791340		COC(=O)c1c(cc(=O)n2c1CCN(CC2)Cc3cccn3c4ncccn4)OC[C@@H]5CCCCO5
ZINC19799147		c1ccc(cc1)[C@@H]2C=C(Nc3n2nc(n3)NC(=O)CCCC(=O)[O-])c4ccccc4
ZINC19799150		c1ccc(cc1)[C@H]2C=C(Nc3n2nc(n3)NC(=O)CCCC(=O)[O-])c4ccccc4
ZINC19799560		c1ccc(cc1)[C@H]2CC(=Nc3n2nc(n3)NC(=O)CCC(=O)[O-])c4ccccc4
ZINC19831169		CC1=C([C@@H](C2=C(N1)CC(CC2=O)(C)C)c3cccs3)C(=O)OCc4ccc(cc4)OC
ZINC19839241		COC(=O)c1c(cc(=O)n2c1CCN(CC2)Cc3cccn3c4ncccn4)OCc5ccncc5
ZINC20026638		CCOC(=O)C1=C(NC(=C([C@@H]1c2ccc(cc2)C(=O)OC)C#N)SCC(=O)N)C
ZINC20095908		COC(=O)c1ccc(cc1)N2C(=O)c3ccc(cc3C2=O)C(=O)Nc4cccc5c4cccc5
ZINC20348223		CCOC(=O)C1=C(NC(=C([C@@H]1c2ccco2)C#N)SCC(=O)NC(C)(C)C)c3ccccc3
ZINC20426590		C[C@@H](CNC(=O)COc1ccc(cc1)c2cc3cc(ccc3oc2=O)Br)O
ZINC23118917		Cc1cc(n2c(n1)cc(n2)c3ccccc3OC)N4CCN(CC4)CCO
ZINC23231777		c1ccc2c(c1)CC[NH+](C2)C[C@H](COc3cccc(c3)CNCCc4cnccn4)O
ZINC23232045		Cc1ccn(n1)CCNC(=O)Nc2nnc(s2)Cc3ccc(cc3)Cl
ZINC27696609		c1ccc2c(c1)cccc2Cc3nc4ccccc4n3C[C@@H](CO)O
ZINC27970853		Cc1cc(n(n1)Cc2cccc(c2)C(=O)N3CCc4ccccc4C3)C
ZINC30836149		c1ccc(cc1)COC(=O)N[C@H](CCC(=O)N)C(=O)N[C@H](Cc2ccc(cc2)O)C(=O)[O-]
ZINC40779117		Cc1ccc2c(c1)NC(=O)[C@@](O2)(C)C(=O)Nc3cccc(c3)C(=O)N
ZINC55245284		c1ccc(cc1)C[C@H](Cn2cc(c(=O)c(c2)Oc3ccccc3)C(=O)[O-])O
ZINC55269754		c1ccc(c(c1)/C=C/c2ccc3cccc(c3n2)O)NC(=O)CCc4cc(=O)[nH]o4
ZINC55392827		C[C@H](c1nc([nH]n1)CC(=O)[O-])NC(=O)c2ccccc2NCc3cccs3
ZINC55403541		c1ccc2c(c1)c(cn2CCOc3ccccc3F)C[NH2+]CCN4CCNC4=O
ZINC55414908		Cc1cc2ccccc2n1CCC(=O)N[C@@H](C)c3cn4c(n3)scn4
ZINC57355767		Cn1c(nnc1SCc2cc(=O)[nH]c(n2)CO)c3cccs3
ZINC57355769		Cc1cc(n(n1)C)c2nnc(o2)SCc3cc(=O)[nH]c(n3)CO

## Sheet: Tested  Compounds
Supplementary Table II. List of compounds experimentally tested
ZINC_ID		name	smiles
ZINC04503235		A1	CC(C)(C)OC(=O)N1[C@@](CC(=N1)c2ccc(cc2)Br)(C(F)(F)F)O
ZINC06494010		A2	c1ccc2c(c1)[nH]c(n2)Cc3nc([nH]n3)N
ZINC01112200		A3	CCOC(=O)CN1c2ccccc2[C@@](C1=O)(c3c([nH]c4c3cccc4)C)O
ZINC01245101		A4	CCOc1ccccc1[C@@H]2[C@H](C(=O)NC(=C2C#N)SCC(=O)OC)C#N
ZINC04085376		A6	Cc1c2cc(ccc2oc(=O)c1c3cc(ccc3OC)OC)O
ZINC18198322		B1	COc1ccc(cc1OC)[C@H]2Cc3c(cc4c(n3)[nH]n(c4=O)c5ccccc5)C(=O)C2
ZINC02434635		B2	c1ccc2c(c1)cccc2Cc3nc(c(o3)NCc4ccc5c(c4)OCO5)C#N
ZINC27696609		B3	c1ccc2c(c1)cccc2Cc3nc4ccccc4n3C[C@@H](CO)O
ZINC02789051		B4	CC(C)COc1cccc(c1)c2cc(c3ccccc3n2)C(=O)NC(=S)Nc4ccccc4C(=O)[O-]
ZINC18266646		B5	CCCCCc1c(nc([nH]c1=O)Nc2nc(c3ccccc3n2)C)C
ZINC09019436		B6	Cc1ccc(cc1S(=O)(=O)NC2CCCCC2)c3c4ccccc4c(nn3)Nc5ccc(cc5)CC(=O)N
ZINC00793356		B7	COC(=O)CN1c2ccccc2[C@@](C1=O)(CC(=O)c3ccc(cc3)F)O
ZINC01441541		B8	c1ccc(c(c1)N2CCN(CC2)C3=CC(=O)N(C3=O)c4ccc(cc4)F)O
ZINC00798328		C1	Cc1c(c2cc(ccc2n1c3ccc(cc3)Cl)OCC(=O)N)C(=O)C
ZINC02269985		C2	c1ccc(cc1)COC(=O)NCCCCCC(=O)Oc2ccc3ccc(=O)oc3c2
ZINC04524596		C3	Cc1ccn(n1)S(=O)(=O)c2ccc(c(c2)[N+](=O)[O-])N3CCCC3=O
ZINC01070326		C4	c1cn(nc1[N+](=O)[O-])CC(=O)Nc2c(c3c(s2)CCCC3)C#N
ZINC09762871		C6	c1ccc2c(c1)ccc(c2/C=N/N=C/3\NC(=O)[C@H](S3)CC(=O)[O-])OCc4ccccc4Cl
